# Supplementary material for: Chemoselective hydrogenation of 3-nitrostyrene over a Pt/FeOx pseudo-single-atom-catalyst in CO2-expanded liquids
Source: Royal Society of Chemistry journal article supplement (doi:10.1039/c5gc01914a), 2015-10-09
Supplement: c5gc01914a1.pdf [file c5gc01914a1.pdf]

# Supporting information

## Chemoselective hydrogenation of 3-nitrostyrene over Pt/FeOx pseudo-single-atom-catalyst in CO<sub>2</sub>-expanded liquids

Gang Xu,<sup>a,b</sup> Haisheng Wei,<sup>b</sup> Yujing Ren,<sup>b</sup> Jianzhong Yin,<sup>\*a</sup> Aiqin Wang,<sup>\*b</sup> and Tao Zhang<sup>b</sup>

- a. State Key Laboratory of Fine Chemicals, School of Chemical Machinery, Dalian University of Technology, Dalian 116024, China. E-mail: jzyin@dlut.edu.cn
- b. State Key Laboratory of Catalysis, Dalian Institute of Chemical Physics, Chinese Academy of Sciences, Dalian 116023, China. E-mail: aqwang@dicp.ac.cn; taozhang@dicp.ac.cn

### Solubility measurement

The schematic diagram of a volume-variable optical solubility measurement apparatus is illustrated in Fig S1. The apparatus mainly consist of quartz windowed cell with a volume of 31.95 mL which can sustain pressure up to 30 MPa and temperature up to 80 °C, a volume-variable plug piston with volume range from 0 to 1.5 mL, a cold trap, and a high performance liquid chromatography (HPLC) pump. The view cell was heated by a water bath. In a typical experiment, a magnetic stirrer and a designated amount of 3-nitrostyrene was introduced to the cell, and the air in the view cell was replaced by CO<sub>2</sub>. Then, the view cell was sealed and heated to the designated temperature in the water bath. The temperature and pressure in the cell were measured using a thermocouple with the accuracy of  $\pm 0.1$  °C and a pressure transducer (DG1300-BZ-A-2-40) with the accuracy of  $\pm 0.01$  MPa, respectively. CO<sub>2</sub> was added into the cell very slowly using the HPLC pump till an optical transparent single phase was formed. Subsequently, the pressure in the cell was gradually decreased by controlling the variable-volume piston until the cloud point was reached (Fig. S2). The cloud-point pressure P was recorded. For each condition, the solubility measurement was performed at least three times, and the data of cloud-point pressure at each experimental condition were averaged with the combined expanded uncertainty within  $\pm 0.04$  MPa (level of confidence = 0.95, where k= 2). The amount of supercritical carbon dioxide used in each run was obtained using the volume of the view cell and the density of the carbon dioxide at the specific pressure and temperature from NIST Chemistry WebBook. The dissolved amount of 3-nitrostyrene in the hydrogenation reactor was estimated using its solubility in scCO<sub>2</sub>, the volume of reactor and the density of the carbon dioxide at reaction conditions.

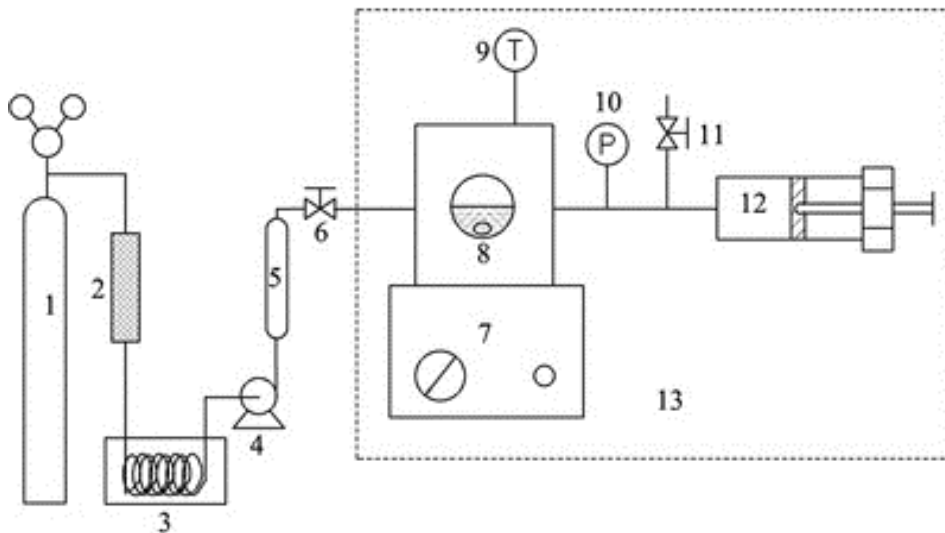

Fig. S1. Apparatus for solubility measurements.

(1) CO<sub>2</sub> cylinder; (2) filter; (3) cooling coil; (4) HPLC pump; (5) surge tank; (6) needle valve; (7) magnetic stirrer; (8) view cell; (9) thermocouple; (10) pressure sensor; (11) vent valve; (12) volume-variable plug piston; (13) water bath.

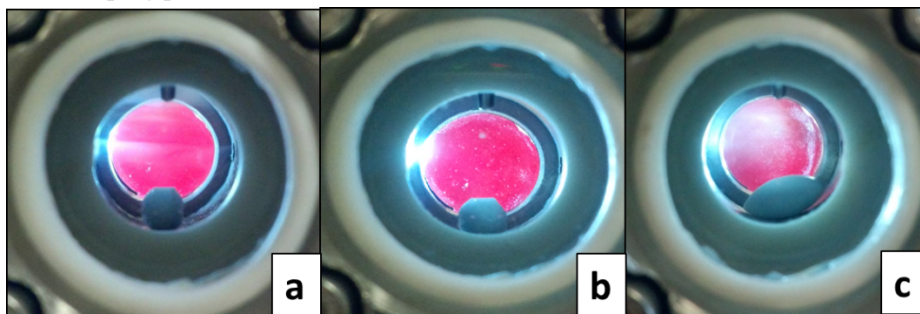

Fig. S2 Phase observation of CO<sub>2</sub>-substrate ( through the view cell at 40 °C (a) 8.5 MPa (b)10.2 MPa (c) 10 MPa

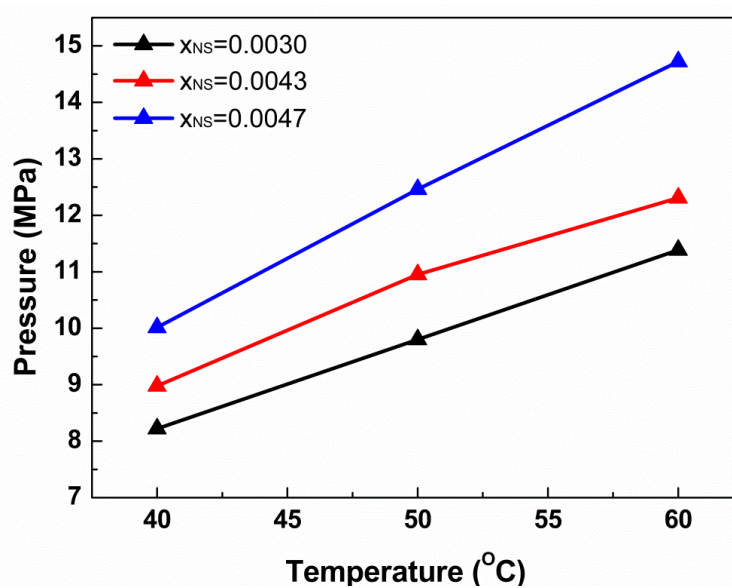

Fig. S3 P-T phase diagram for the system NS+ CO<sub>2</sub> at different concentrations.

## Phase equilibrium of CO<sub>2</sub>+toluene, CO<sub>2</sub>+ethanol, CO<sub>2</sub>+THF at 40 °C

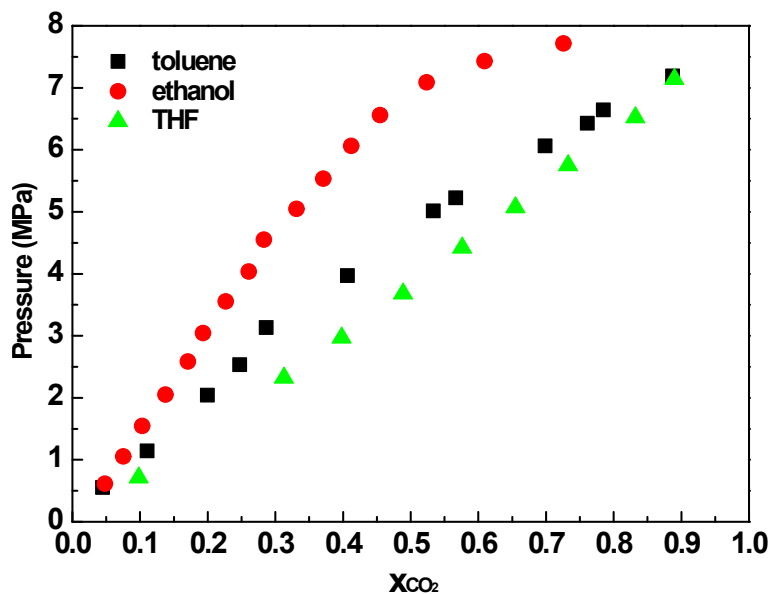

Fig. S4 The molar fraction of CO<sub>2</sub> in different organic solvents at 40 °C and different pressures. The data was taken from literatures <sup>1-3</sup>.

## Thermodynamic calculation

The VLE data for the ternary systems (toluene, CO<sub>2</sub> and H<sub>2</sub>) were simulated at the experimental conditions by using the PR-BM equation of state with van der Waals mixing rules and binary interaction parameters<sup>4, 5</sup>. The critical parameters were obtained from the Aspen library. The Aspen regression was used to calculate the binary interaction parameters by fitting the experimental VLE data in the literature <sup>6-8</sup> for the binary system.

The PR equation of state (EOS) is expressed as:

$$P = \frac{RT}{v-b} - \frac{a}{v(v+b) + b(v-b)}$$

Where

$$b = \sum_i x_i b_i$$

$$a = \sum_i \sum_j x_i x_j (\alpha_i \alpha_j)^{0.5} (1 - k_{ij})$$

$$\alpha_i = 0.45724 \left( \frac{R^2 T_{ci}^2}{P_{ci}} \right) \alpha(T_{ri}, \omega_i)$$

$$b_i = 0.0778 \frac{RT_{ci}}{P_{ci}}$$

$$\alpha(T_{ri}, \omega_i) = \exp^2 \left[ n_i (1 - T_{ri}^{d_i}) \right]$$

$$d_i = 1 + \frac{h_i}{2}$$

$$n_i = 1 - \frac{1}{d_i}$$

$$h_i = 0.37464 + 1.54226\omega_i - 0.26992\omega_i^2$$

The objective function used for fitting is given by eq. 1 with a convergence criterion of less than  $10^{-4}$  for liquid phase compositions. Table S1 summarizes the binary interaction parameters used in the simulation. The simulated VLE data for the  $\text{CO}_2 + \text{H}_2 + \text{C}_7\text{H}_8$  ternary system at (40 °C) are shown in Table S2. To better understand the effect of  $\text{CO}_2$  on the  $\text{H}_2$  solubility, the  $\text{H}_2$  solubility in  $\text{CO}_2$ -expanded  $\text{C}_7\text{H}_8$  is compared with the  $\text{H}_2$  solubility in pure  $\text{C}_7\text{H}_8$ . The  $\text{H}_2$  solubility enhancement factor (E)<sup>9</sup> is defined as

$$E = \frac{x^{\text{CXL}}}{x^{\text{neat solvent}}}$$

Where  $x^{\text{CXL}}$  and  $x^{\text{neat solvent}}$  represent the mole fractions of the permanent gas component ( $\text{H}_2$ ) in the CXL and neat solvent, respectively. It is noteworthy that the  $\text{H}_2$  solubility in pure solvent is compared to  $\text{H}_2$  solubility in CXL solvent at the same temperature and gas phase  $\text{H}_2$  fugacity

Table S1. Binary Interaction Parameters  $k_{ij}$  used in the PR EOS

| Compounds                                            | Temperature( °C) | $k_{ij}$ |
|------------------------------------------------------|------------------|----------|
| <b><math>\text{CO}_2\text{-C}_7\text{H}_8</math></b> | 40               | 0.101    |
| <b><math>\text{H}_2\text{-C}_7\text{H}_8</math></b>  | 40               | 0.357    |
| <b><math>\text{H}_2\text{-CO}_2</math></b>           | 40               | 0.195    |

$$AAD\% = \frac{1}{n} \sum_i \left| \frac{x_i^{\text{cal}} - x_i^{\text{exp}}}{x_i^{\text{exp}}} \right| \times 100\% \quad (1)$$

$P$ 、 $T$  — pressure(MPa), temperature(K);  $v$  — molar volume, ml/mol;  $P_{ci}$ 、 $T_{ri}$ 、 $T_{ci}$ 、 $\omega_i$  — critical pressure, reduced temperature( $T_{ri} = T/T_{ci}$ ), critical temperature and acentric factor of component  $i$ ;  $x_i$  — mole fraction of component  $i$ ; The mass fraction  $m_i$  was calculated from  $x_i$ .

The volume expansion of a  $\text{CO}_2$ -expanded organic solvent is defined<sup>10</sup> as:

$$\Delta V(\%) = \frac{V(P, T, x_1) - V(P^0, T)}{V(P^0, T)} \times 100\%$$

$V(P^0, T)$  is the total volume of a pure organic solvent at the specific temperature and reference pressure (usually at 1 atm).  $V(P, T, x_i)$  represents the total volume of a  $\text{CO}_2$ -expanded organic solvent with the  $\text{CO}_2$  mole fraction of  $x_i$ .

Table S2 Vapor–liquid equilibrium data for the system CO<sub>2</sub>(1) + H<sub>2</sub>(2) + toluene(3)

| Pressure<br>(MPa) | x <sub>1</sub> | x <sub>2</sub> | y <sub>1</sub> | y <sub>2</sub> | x <sub>neat</sub> | E    |
|-------------------|----------------|----------------|----------------|----------------|-------------------|------|
| 6                 | 0.263          | 0.012          | 0.534          | 0.463          | 0.011             | 1.09 |
| 6.6               | 0.314          | 0.013          | 0.587          | 0.410          | 0.011             | 1.18 |
| 7.5               | 0.391          | 0.014          | 0.653          | 0.343          | 0.011             | 1.27 |
| 8.5               | 0.479          | 0.015          | 0.712          | 0.284          | 0.011             | 1.36 |
| 9                 | 0.525          | 0.016          | 0.737          | 0.258          | 0.011             | 1.45 |
| 9.5               | 0.574          | 0.017          | 0.761          | 0.234          | 0.011             | 1.55 |
| 10                | 0.626          | 0.018          | 0.782          | 0.212          | 0.011             | 1.64 |
| 11                | 0.744          | 0.024          | 0.818          | 0.175          | 0.012             | 2.00 |
| 12                | 0.888          | 0.056          | 0.852          | 0.136          | 0.013             | 4.31 |

### References

1. P. Naidoo, D. Ramjugernath and J. D. Raal, *Fluid Phase Equilib.*, 2008, **269**, 104-112.
2. K. Tochigi, T. Namae, T. Suga, H. Matsuda, K. Kurihara, M. C. dos Ramos and C. McCabe, *J. Supercrit. Fluids*, 2010, **55**, 682-689.
3. M. J. Lazzaroni, D. Bush, J. S. Brown and C. A. Eckert, *J. Chem. Eng. Data*, 2005, **50**, 60-65.
4. D. Peng and D. B. Robinson, *Ind. Eng. Chem. Fundam.*, 1976, **15**, 59-64.
5. P. M. Mathias and T. W. Copeman, *Fluid Phase Equilib.*, 1983, **13**, 91-108.
6. J. Z. Yin and C. S. Tan, *Fluid Phase Equilib.*, 2006, **242**, 111-117.
7. H. Tochigi, K. Hasegawa, N. Asano and K. Kojima, *J. Chem. Eng. Data*, 1998, **43**, 954-956.
8. K. Bezanehtak, G. B. Combes, F. Dehghani, N. R. Foster and D. L. Tomasko, *J. Chem. Eng. Data*, 2002, **47**, 161-168.
9. Z. Z. Xie, W. K. Snavely, A. M. Scurto and B. Subramaniam, *J. Chem. Eng. Data*, 2009, **54**, 1633-1642.
10. A. Kordikowski, A. P. Schenk, R. M. VanNielen and C. J. Peters, *J. Supercrit. Fluids*, 1995, **8**, 205-216.
